# Supplementary material
Source: PubMed Central journal article supplement (PMC10200735)
Supplement: NIHMS1860780-supplement-1.pdf [file NIHMS1860780-supplement-1.pdf]

**Title: Reporting of Important Social Determinants of Health in Pediatric Clinical Trials**

**Authors:** Chris A. Rees, Amanda M. Stewart, Elyse N. Portillo, Sagar Mehta, Elorm Avakame, Jasmyne Jackson, Jheanelle McKay, Kenneth A. Michelson, Christopher P. Duggan, Eric W. Fleegler

**Journal:** *American Journal of Preventive Medicine*

**Appendix Query.** PubMed query to identify pediatric clinical trials published in leading pediatric and general medical journals.

```
((((((((((("JAMA pediatrics"[Journal]) OR ("The Lancet. Child & adolescent health"[Journal])) OR ("Pediatrics"[Journal])) OR ("The Journal of adolescent health : official publication of the Society for Adolescent Medicine"[Journal])) OR ("The Journal of pediatrics"[Journal])) OR ("The New England journal of medicine"[Journal])) OR ("Lancet (London, England)"[Journal])) OR ("JAMA"[Journal])) OR ("BMJ (Clinical research ed.)"[Journal])) OR ("PLoS medicine"[Journal])) AND ("pediatrics"[MeSH Terms] OR "pediatric"[Title/Abstract] OR "child"[MeSH Terms] OR "child"[Title/Abstract] OR "children"[Title/Abstract] OR "adolescent"[MeSH Terms] OR "adolescent"[Title/Abstract] OR "adolescents"[Title/Abstract] OR "adolescence"[Title/Abstract] OR "teen"[Title/Abstract] OR "teens"[Title/Abstract] OR "teenagers"[Title/Abstract] OR "teenager"[Title/Abstract] OR "youth"[Title/Abstract] OR "youths"[Title/Abstract] OR "infant"[MeSH Terms] OR "infants"[Title/Abstract] OR "infant"[Title/Abstract] OR "baby"[Title/Abstract] OR "babies"[Title/Abstract] OR "infant, newborn"[MeSH Terms] OR "neonate"[Title/Abstract] OR "neonates"[Title/Abstract])) AND (((("clinical trial"[Publication Type] OR "Adaptive Clinical Trial"[Publication Type] OR "Clinical Trial, Phase I"[Publication Type] OR "Clinical Trial, Phase II"[Publication Type] OR "Clinical Trial, Phase III"[Publication Type] OR "Clinical Trial, Phase IV"[Publication Type] OR "Controlled Clinical Trial"[Publication Type]) OR ("Clinical Trials as Topic"[mesh] OR "Adaptive Clinical Trials as Topic"[mesh] OR "Clinical Trials, Phase I as Topic"[mesh] OR "Clinical Trials, Phase II as Topic"[mesh] OR "Clinical Trials, Phase III as Topic"[mesh] OR "Clinical Trials, Phase IV as Topic"[mesh] OR "Controlled Clinical Trials as Topic"[mesh] OR "Non-Randomized Controlled Trials as Topic"[mesh] OR "Randomized Controlled Trials as Topic"[mesh] OR "Single-Case Studies as Topic"[mesh] OR "multicenter studies as topic"[mesh] OR "double blind method"[mesh])) OR ("clinical trial" OR "clinical trials" OR "randomized trial" OR "randomized trials" OR "randomised trial" OR "randomised trials" OR "randomized controlled trial" OR "randomized controlled trials" OR "randomised controlled trial" OR "randomised controlled trials" OR "single blind" OR "single blinded" OR "double blind" OR "double blinded" OR "triple blind" OR "triple blinded" OR ((randomised OR randomized) AND (trial OR trials)) OR ((single OR double OR doubled OR triple OR tripled OR treble OR treble) AND (blind* OR mask*)) OR ("4 arm" OR "four arm")))) AND (("2011/01/01"[Date - Publication] : "2020/12/31"[Date - Publication]))
```
