# Supplementary material
Source: PubMed Central journal article supplement (PMC10200735)
Supplement: NIHMS1860780-supplement-2.pdf [file NIHMS1860780-supplement-2.pdf]

**Title: Reporting of Important Social Determinants of Health in Pediatric Clinical Trials**

**Authors:** Chris A. Rees, Amanda M. Stewart, Elyse N. Portillo, Sagar Mehta, Elorm Avakame, Jasmyne Jackson, Jheanelle McKay, Kenneth A. Michelson, Christopher P. Duggan, Eric W. Fleegler

**Journal:** *American Journal of Preventive Medicine*

**Appendix Table.** Elements of caregiver or participant socioeconomic factors reported in 293 published articles reporting pediatric clinical trial results<sup>a</sup>

| <b>Socioeconomic factor</b>                       | <b>n (%)</b> |
|---------------------------------------------------|--------------|
| Caregiver education                               | 190 (39.0)   |
| Household income                                  | 135 (27.7)   |
| Insurance type or status                          | 90 (18.5)    |
| School lunch program enrollment                   | 18 (3.7)     |
| Caregiver employment                              | 15 (3.1)     |
| Community level income                            | 12 (2.5)     |
| Women, Infants, and Children (WIC) enrollment     | 7 (1.4)      |
| Receipt of public assistance                      | 6 (1.2)      |
| Low socioeconomic status, not otherwise specified | 5 (1.0)      |
| Literacy                                          | 5 (1.0)      |
| Food insecurity                                   | 2 (0.4)      |
| Family Aid Index                                  | 1 (0.2)      |
| Composite socioeconomic score                     | 1 (0.2)      |

<sup>a</sup>Published trials may have reported >1 socioeconomic measure
